# Supplementary material
Source: Springer Nature journal article supplement (https://www.springermedizin.de/resource/supplementary/12888_2009_663_MOESM6_ESM.pdf/9478092)
Supplement: MOESM6 [file 9478092]

---

**Subgroup within study****Study name****Statistics for each study****Events / Total****Odds ratio and 95% CI**

|                    |                              | <b>Odds<br/>ratio</b> | <b>Lower<br/>limit</b> | <b>Upper<br/>limit</b> | <b>Black</b> | <b>White</b> |  |
|--------------------|------------------------------|-----------------------|------------------------|------------------------|--------------|--------------|--|
| Interview Schedule | Compton, 2000 <sup>2</sup>   | 0.855                 | 0.578                  | 1.265                  | 109 / 258    | 77 / 167     |  |
| Interview Schedule |                              | <b>0.855</b>          | <b>0.578</b>           | <b>1.265</b>           |              |              |  |
| No interview       | Castaneda, 1985 <sup>3</sup> | 0.613                 | 0.368                  | 1.023                  | 25 / 558     | 41 / 577     |  |
| No interview       | Coid, 2000 <sup>4</sup>      | 0.217                 | 0.151                  | 0.313                  | 33 / 628     | 452 / 2224   |  |
| No interview       | Maden, 1999 <sup>1</sup>     | 0.221                 | 0.088                  | 0.558                  | 6 / 100      | 28 / 125     |  |
| No interview       | Coid, 1999 <sup>5</sup>      | 0.209                 | 0.145                  | 0.301                  | 33 / 648     | 470 / 2303   |  |
| No interview       |                              | <b>0.281</b>          | <b>0.169</b>           | <b>0.467</b>           |              |              |  |

0.01      0.1      1      10      100
